# Supplementary material for: Aberrant Splicing of INS Impairs Beta-Cell Differentiation and Proliferation by ER Stress in the Isogenic iPSC Model of Neonatal Diabetes
Source: MDPI journal article supplement (doi:10.3390/ijms23158824), 2022-08-08
Supplement: s1 [file s1]

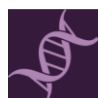

Article

# Aberrant splicing of *INS* impairs beta-cell differentiation and proliferation by ER stress in the isogenic iPSC model of neonatal diabetes

Alexandra V. Panova, Natalia V. Klementieva, Anna V. Sycheva, Elena V. Korobko, Anastasia O. Sosnovtseva, Tatiana S. Krasnova, Maria R. Karpova, Petr M. Rubtsov, Yulia V. Tikhonovich, Anatoly N. Tiulpakov, Sergey L. Kiselev

**Table S1.** List of sgRNAs and oligonucleotides for sgRNA cloning.

| Name    | Sequence, 5'-3'      | PAM | Oligonucleotide sequence for cloning                             |
|---------|----------------------|-----|------------------------------------------------------------------|
| sgRNA-1 | GTTCCAGAACCTGCTCTGCG | CGG | Fwd: GTTCCAGAACCTGCTCTGCGGTTTT<br>Rev: CGCAGAGCAGGTTCTGGAACCGGTG |
| sgRNA-2 | CAGGTTCTGGAACAGCGGCG | AGG | Fwd: CAGGTTCTGGAACAGCGGCGGTTTT<br>Rev: CGCCGCTGTTCCAGAACCTGCGGTG |
| sgRNA-3 | CAGAGCAGGTTCTGGAACAG | CGG | Fwd: CAGAGCAGGTTCTGGAACAGGTTTT<br>Rev: CTGTTCCAGAACCTGCTCTGCGGTG |

Single-stranded oligodeoxynucleotide (ssODN):

5'-TCCTGTGTCCCTCTGCCTCGCCGCTGTTCCGGAACCTGCTCTGCGCGGCACGTCCTGGCAG-TCGGGCAGGTGGAGCTGGGCGGGGGCCCTGGT-3'

**Table S2.** Comparison of culture conditions for iPSC single cell cloning after FACS analysis.

| Matrix                   | Medium                                    | Viability, % |
|--------------------------|-------------------------------------------|--------------|
| Feeder cells on Matrigel | mTESR1                                    | 2.1%         |
| Feeder cells on Matrigel | ½ mTESR1 + ½ conditioned mTESR1           | 5.2%         |
| Feeder cells on Matrigel | ½ mTESR1 + ½ conditioned mTESR1 + 10% KSR | 8.3%         |
| Matrigel                 | ½ mTESR1 + ½ conditioned mTESR1           | 0%           |

**Table S3.** Summary of sequencing results of iPSC clone screening.

| Clone number | Intron genotype                   | Presence of cleavage |
|--------------|-----------------------------------|----------------------|
| patient      | Heterozygous mutation c.188-31G>A | N/A                  |
| sgRNA-3      |                                   |                      |

|                |                                     |     |
|----------------|-------------------------------------|-----|
| 3              | Heterozygous mutation c.188-31G>A   | no  |
| 13             | Heterozygous mutation c.188-31G>A   | no  |
| 16             | Heterozygous mutation c.188-31G>A   | no  |
| 17             | Heterozygous mutation c.188-31G>A   | no  |
| 18             | Del/ins at the position c.188-31G>A | yes |
| 27             | Heterozygous mutation c.188-31G>A   | no  |
| 42             | Heterozygous mutation c.188-31G>A   | no  |
| 2              | Heterozygous mutation c.188-31G>A   | no  |
| 3              | Del/ins at the position c.188-31G>A | yes |
| 4              | Heterozygous mutation c.188-31G>A   | no  |
| 6              | Heterozygous mutation c.188-31G>A   | no  |
| 7              | Del/ins at the position c.188-31G>A | yes |
| 9              | Del/ins at the position c.188-31G>A | yes |
| 10             | Heterozygous mutation c.188-31G>A   | no  |
| 11             | Heterozygous mutation c.188-31G>A   | no  |
| 12             | Heterozygous mutation c.188-31G>A   | no  |
| 13             | Heterozygous mutation c.188-31G>A   | no  |
| 14             | Heterozygous mutation c.188-31G>A   | no  |
| 15             | Heterozygous mutation c.188-31G>A   | no  |
| 16             | Heterozygous mutation c.188-31G>A   | no  |
| 18             | Del/ins at the position c.188-31G>A | yes |
| 19             | Heterozygous mutation c.188-31G>A   | no  |
| 20             | Heterozygous mutation c.188-31G>A   | no  |
| 21             | Heterozygous mutation c.188-31G>A   | no  |
| 22             | Del/ins at the position c.188-31G>A | yes |
| <b>sgRNA-2</b> |                                     |     |
| 1              | Heterozygous mutation c.188-31G>A   | no  |
| 2              | Heterozygous mutation c.188-31G>A   | no  |

---

|    |                                     |     |
|----|-------------------------------------|-----|
| 3  | Del/ins at the position c.188-31G>A | yes |
| 4  | Heterozygous mutation c.188-31G>A   | no  |
| 5  | Heterozygous mutation c.188-31G>A   | no  |
| 6  | Heterozygous mutation c.188-31G>A   | no  |
| 7  | Heterozygous mutation c.188-31G>A   | no  |
| 8  | Heterozygous mutation c.188-31G>A   | no  |
| 9  | Heterozygous mutation c.188-31G>A   | no  |
| 10 | Heterozygous mutation c.188-31G>A   | no  |
| 11 | Heterozygous mutation c.188-31G>A   | no  |
| 12 | Del/ins at the position c.188-31G>A | yes |
| 13 | Heterozygous mutation c.188-31G>A   | no  |
| 14 | Heterozygous mutation c.188-31G>A   | no  |
| 15 | Heterozygous mutation c.188-31G>A   | no  |
| 16 | Heterozygous mutation c.188-31G>A   | no  |
| 17 | Del/ins at the position c.188-31G>A | yes |
| 18 | Heterozygous mutation c.188-31G>A   | no  |
| 19 | Duplication                         | yes |
| 20 | Insertion 7bp                       | yes |
| 21 | Heterozygous mutation c.188-31G>A   | no  |
| 22 | Heterozygous mutation c.188-31G>A   | no  |
| 23 | Heterozygous mutation c.188-31G>A   | no  |
| 24 | Heterozygous mutation c.188-31G>A   | no  |
| 36 | Heterozygous mutation c.188-31G>A   | no  |
| 37 | Del/ins at the position c.188-31G>A | yes |
| 38 | Heterozygous mutation c.188-31G>A   | no  |
| 39 | Heterozygous mutation c.188-31G>A   | no  |
| 40 | Heterozygous mutation c.188-31G>A   | no  |
| 41 | Heterozygous mutation c.188-31G>A   | no  |

---

|    |                                     |     |
|----|-------------------------------------|-----|
| 46 | Del/ins at the position c.188-31G>A | yes |
| 47 | Heterozygous mutation c.188-31G>A   | no  |
| 48 | Heterozygous mutation c.188-31G>A   | no  |
| 49 | Heterozygous mutation c.188-31G>A   | no  |
| 50 | Del/ins at the position c.188-31G>A | yes |
| 51 | Heterozygous mutation c.188-31G>A   | no  |
| 52 | Del/ins at the position c.188-31G>A | yes |
| 53 | Heterozygous mutation c.188-31G>A   | no  |
| 54 | Heterozygous mutation c.188-31G>A   | no  |
| 55 | Del/ins at the position c.188-31G>A | yes |
| 56 | Heterozygous mutation c.188-31G>A   | no  |
| 57 | Heterozygous mutation c.188-31G>A   | no  |
| 58 | Heterozygous mutation c.188-31G>A   | no  |
| 59 | Heterozygous mutation c.188-31G>A   | no  |
| 60 | Heterozygous mutation c.188-31G>A   | no  |
| 61 | Homozygous c.188-31G                | yes |
| 62 | Heterozygous mutation c.188-31G>A   | no  |
| 63 | Heterozygous mutation c.188-31G>A   | no  |
| 64 | Heterozygous mutation c.188-31G>A   | no  |
| 65 | Heterozygous mutation c.188-31G>A   | no  |

**Table S4.** Key points of pancreatic differentiation protocol.

|                |       |                                           |
|----------------|-------|-------------------------------------------|
| <b>Stage 1</b> | Day 1 | Basa medium + supplement A + supplement B |
|                | Day 2 |                                           |
|                | Day 3 | Basal medium + supplement B               |
|                | Day 4 |                                           |

|                                                            |        |                                                                                                        |
|------------------------------------------------------------|--------|--------------------------------------------------------------------------------------------------------|
| <b>Stage 2</b><br><b>(posterior foregut induction)</b>     | Day 5  | RPMI + B27 (1×)                                                                                        |
|                                                            | Day 6  | +FGF7 50ng/ml                                                                                          |
| <b>Stage 3</b><br><b>(pancreatic endoderm induction)</b>   | Day 7  | DMEM, Glutamax (1x), sodium pyruvate (1x), B27 (1×)                                                    |
|                                                            | Day 8  | +KAAD 0.25µM<br>+RA 2µM                                                                                |
|                                                            | Day 9  | +LDN 250nM                                                                                             |
| <b>Stage 4</b><br><b>(pancreatic progenitor induction)</b> | Day 10 |                                                                                                        |
|                                                            | Day 11 | DMEM, Glutamax (1x), sodium pyruvate (1x), B27 (1×)                                                    |
|                                                            | Day 12 | +EGF 50ng/ml                                                                                           |
|                                                            | Day 13 | DMEM, Glutamax (1x), sodium pyruvate (1x), B27 (1×)                                                    |
| <b>Stage 5</b>                                             | Day 14 | + KAAD 0.25µM<br>+ T3 1µM<br>+ Alk5i 10µM<br>+ Zinc-Sulfate 10µM<br>+ Heparin 10µg/ml<br>+ Y-27632 5µM |

**Table S5.** List of reagents for beta-cell culturing.

| Reagent            | Company   | Final concentration | Stock concentration |
|--------------------|-----------|---------------------|---------------------|
| Sodium bicarbonate | Merck     | 1.5 g/l             | 150g/L (x100)       |
| BSA                | Gibco     | 2%                  | 100 %               |
| SANT-1             | Millipore | 0.25 µM             | 0,25mM (x1000)      |

|                   |                       |               |                                    |
|-------------------|-----------------------|---------------|------------------------------------|
| Retinoic acid     | Stemcell Technologies | 0.05 $\mu$ M  | 1mM (x20.000)<br>Or 50 mkM (x1000) |
| LDN193189         | Stemcell Technologies | 100 nM        | 1mM (x10.000)                      |
| ITS-X             | Gibco                 | 1:200         | 100% (x200)                        |
| T3                | Millipore             | 1 $\mu$ M     | 1mM (x1000)                        |
| ALK5 inhibitor II | Abcam                 | 10 $\mu$ M    | 10 mM (x1000)                      |
| Heparin           | Sigma-Aldrich         | 10 $\mu$ g/ml | 10 mg/ml (x1000)                   |
| EGF               | R&D Systems           | 50 ng/ml      | 500 $\mu$ g/ml (x10.000)           |
| Cyclopamine       | Stemcell Technologies | 0,25 $\mu$ M  | 5mM (x20.000)                      |
| KGF (FGF7)        | Abcam                 | 50 ng/ml      | 100 $\mu$ g/ml (x2.000)            |
| B27               | Gibco                 | 1:100         | 100% (x100)                        |

**Table S6.** List of primers for the *INS* splice variant isoform cloning.

| Name         | Sequence, 5'-3'                                                        |
|--------------|------------------------------------------------------------------------|
| Ins-CDS-RI-F | ATCGAATTCACCTGTCTTCTGCCATGGCCCTG                                       |
| R1InsEx3-R   | TTGAATTCCATCTCTCTCGGTGCAGG                                             |
| GRP78-LucF   | TCCGGTACCCGAGATAGACAGCTGCTGAACCA                                       |
| Grp78-LucR   | TTCCCTCGAGCTTCATCTTGCCAGCCAGT                                          |
| UPRE-1-For   | CACAGGTGCTGACGTGGCATTACAGGTGCTGACGTGGCATTACAGGT                        |
| UPRE-1-Rev   | GTGAATGCCACGTCAGCACCTGTGAATGCCACGTCAGCACCTGTGGTAC                      |
| UPRE-2-For   | GCTGACGTGGCATTACAGGTGCTGACGTGGCATTACAGGTGCTGACGTGGCATTC                |
| UPRE-2-Rev   | TCGAGAATGCCACGTCAGCACCTGTGAATGCCACGTCAGCACCTGTGAATGCCAC-<br>GTCAGCACCT |
| ERSE-For     | CTTACCAATCGGCGGCCTCCACGACGGC                                           |
| ERSE-Rev     | TCGAGCCGTCGTGGAGGCCGCCGATTGGTGAAGGTAC                                  |

**Table S7.** Primers for iPSC clone screening after CRISPR/Cas9 genome editing (371-bp PCR product).

|         | Sequence, 5'-3'        | Tm    | GC %  |
|---------|------------------------|-------|-------|
| Forward | GGGGAGAAGTACTGGGATCACC | 61.55 | 59.09 |
| Reverse | ATTGTTCCACAATGCCACGCTT | 61.92 | 45.45 |

**Table S8.** List of antibodies for immunocytochemistry.

| Antibody                                      | Company, catalog number         | Dilution |
|-----------------------------------------------|---------------------------------|----------|
| Ms anti-PDX1 PE-conjugated                    | BD Biosciences, 562161          | 1:100    |
| Ms anti-NKX6.1 Alexa Fluor 647-conjugated     | BD Biosciences, 563338          | 1:100    |
| Rb mAb to Insulin, Alexa Fluor 647-conjugated | Cell Signaling Technology, 9008 | 1:500    |
| Rb pAb to C-Peptide                           | Cell Signaling Technology, 4593 | 1:100    |
| Ms pAb to Glucagon                            | Sigma, 62654                    | 1:1000   |
| Ms mAb to Somatostatin                        | Santa Cruz SC-55565             | 1:50     |
| Goat anti-Mouse IgG H&L, Alexa Fluor 488      | Abcam, ab150117                 | 1:500    |
| Goat anti-Mouse IgG H&L, Alexa Fluor 594      | Abcam, ab150120                 | 1:500    |
| Goat anti-Rabbit IgG H&L, Alexa Fluor 488     | Abcam, ab150077                 | 1:500    |
| Goat anti-Rabbit IgG H&L, Alexa Fluor 594     | Abcam, ab150084                 | 1:500    |

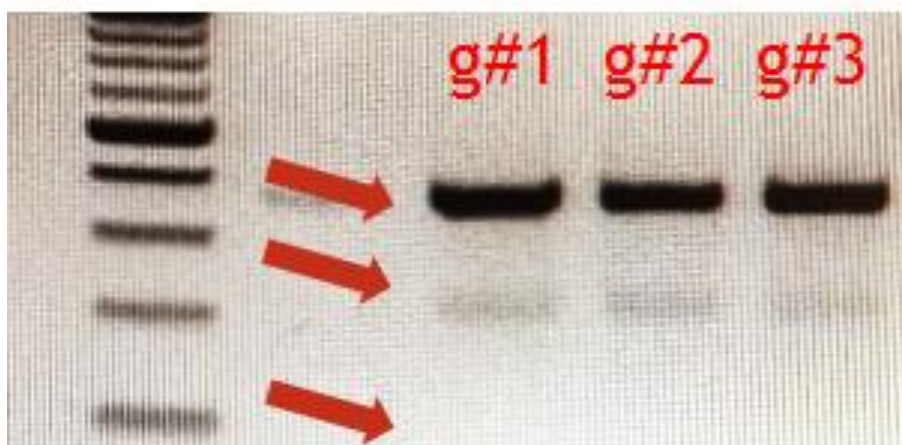

**Figure S1.** Analysis of cutting efficiency of the *INS* allele-specific sgRNAs by T7E1 assay. sgRNA-1, sgRNA-2 and sgRNA-3 used in our study are marked as g#1, g#2 and g#3 on the electrophoregram. Red arrows show bands which are generated when Cas9 nuclease makes modifications to genomic DNA. The cutting efficiency was calculated based on band intensity and amounted to 10%, 11.1%, and 8.9% for sgRNA-1, sgRNA-2 and sgRNA-3, respectively.



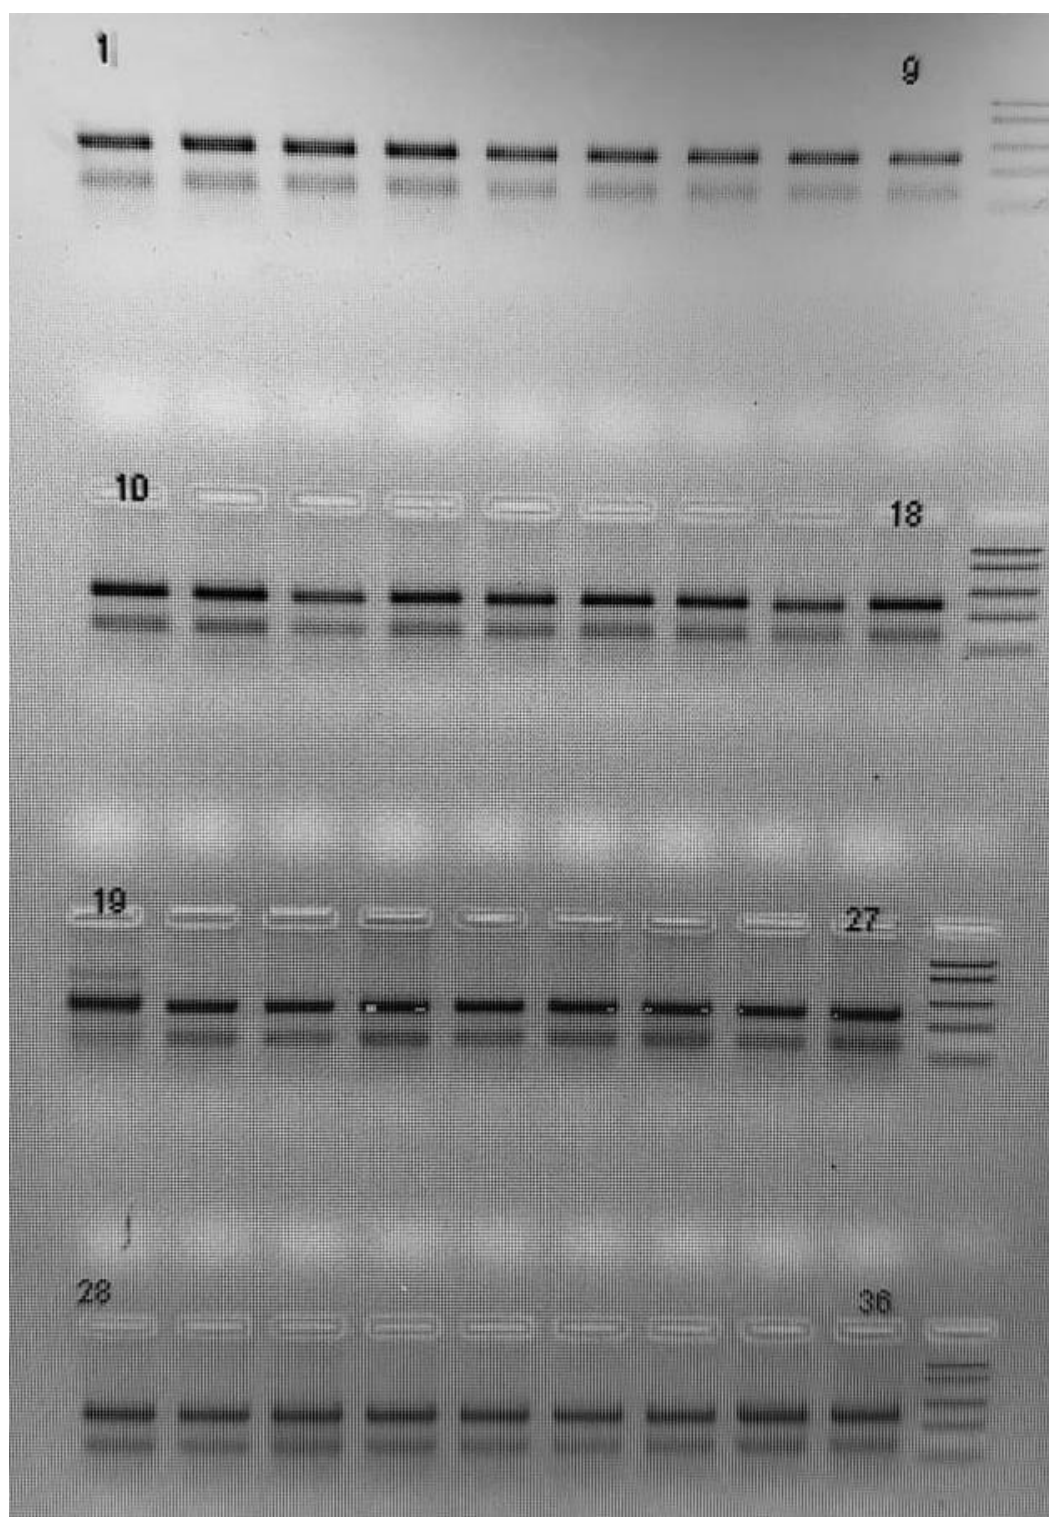

**Figure S2.** Restriction digest screening of iPSC clones after CRISPR/Cas9 editing using *BtsI* enzyme. The electrophoregram shows screening results for the first 36 clones, wherein an additional 400-bp band expected in the case of HDR is observed in clone #19.

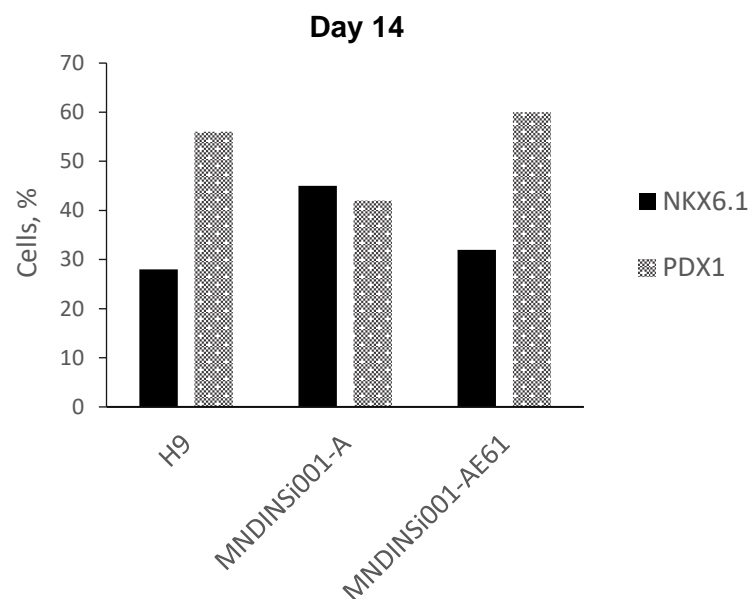

**Figure S3.** The capacity of established isogenic iPSC lines to differentiate into pancreatic progenitor cells. The data show the amount of NKX6.1- and PDX1-positive cells at Day 14 of differentiation for MNDINSi001-A iPSC line carrying c.188-31G>A *INS* mutation and CRISPR/Cas9-corrected MNDINSi001-AE61 iPSC line. H9 ESC line was used as a gold-standard.
